# Supplementary material
Source: publisher site journal article supplement (http://www.kjim.org/upload/media/kjim-2023-189-Supplementary-Table-2.pdf)
Supplement: Supplementary file 1 [file kjim-2023-189-Supplementary-Table-2.pdf]

**Supplementary Table 2. Itemized analysis of SSc patients who did not have ANCA but reclassified as having the overlap syndrome of SSc with AAV according to the 2022 ACR/EULAR criteria for MPA, GPA, or EGPA (n = 3) (patient 3 = GPA, patients 4 and 5 = EGPA)**

| Patients number | Scores based on the 2022 ACR/EULAR criteria for MPA | 1 (-3) | 2 (+6) | 3 (+3) | 4 (+3) | 5 (-1) | 6 (-4) |
|-----------------|-----------------------------------------------------|--------|--------|--------|--------|--------|--------|
| 3               | 3                                                   | 0      | 0      | 1      | 0      | 0      | 0      |
| 4               | -1                                                  | 0      | 0      | 1      | 0      | 0      | 1      |
| 5               | -4                                                  | 0      | 0      | 0      | 0      | 0      | 1      |

1 = Nasal involvement (discharge, ulcers, crusting, congestion, septal defect/perforation); 2 = MPO-ANCA (or P-ANCA) positivity; 3 = Fibrosis or interstitial lung disease on chest imaging; 4 = Pauci-immune glomerulonephritis on biopsy; 5 = PR3-ANCA (or C-ANCA) positivity; 6 = Serum eosinophil count  $\geq 1,000/\mu\text{L}$ .

| Patients number | Scores based on the 2022 ACR/EULAR criteria for GPA | 1 (+3) | 2 (+2) | 3 (+1) | 4 (+5) | 5 (+2) | 6 (+2) | 7 (+1) | 8 (+1) | 9 (-1) | 10 (-4) |
|-----------------|-----------------------------------------------------|--------|--------|--------|--------|--------|--------|--------|--------|--------|---------|
| 3               | 5                                                   | 0      | 0      | 0      | 0      | 1      | 1      | 1      | 0      | 0      | 0       |
| 4               | -2                                                  | 0      | 0      | 0      | 0      | 1      | 0      | 0      | 0      | 0      | 1       |
| 5               | -3                                                  | 0      | 0      | 0      | 0      | 0      | 0      | 1      | 0      | 0      | 1       |

1 = Nasal involvement (discharge, ulcers, crusting, congestion, septal defect/perforation); 2 = Cartilaginous involvement; 3 = Conductive or sensorineural hearing loss; 4 = PR3-ANCA (or C-ANCA) positivity; 5 = Pulmonary nodules, mass or cavitation; 6 = Granuloma, granulomatous inflammation, or giant cells on biopsy; 7 = Nasal/paranasal sinusitis or mastoiditis on imaging; 8 = Pauci-immune glomerulonephritis on biopsy; 9 = MPO-ANCA (or P-ANCA) positivity; 10 = Serum eosinophil count  $\geq 1,000/\mu\text{L}$ .

| Patients number | Scores based on the 2022 ACR/EULAR criteria for EGPA | 1 (+3) | 2 (+3) | 3 (+1) | 4 (+5) | 5 (+2) | 6 (-3) | 7 (-1) |
|-----------------|------------------------------------------------------|--------|--------|--------|--------|--------|--------|--------|
| 3               | 2                                                    | 1      | 0      | 0      | 0      | 0      | 0      | 1      |
| 4               | 7                                                    | 1      | 0      | 0      | 1      | 0      | 0      | 1      |
| 5               | 7                                                    | 0      | 0      | 1      | 1      | 1      | 0      | 1      |

1 = obstructive airway disease; 2 = nasal polyps; 3 = mononeuritis multiplex; 4 = Serum eosinophil count  $\geq 1,000/\mu\text{L}$ ; 5 = Extravascular eosinophilic-predominant inflammation on biopsy; 6 = PR3-ANCA (or C-ANCA) positivity; 7 = hematuria.

SSc, systemic sclerosis; ILD, interstitial lung disease; ACR, American College of Rheumatology; EULAR, European Alliance of Associations for Rheumatology; MPA, microscopic polyangiitis; GPA, granulomatosis with polyangiitis; EGPA, Eosinophilic granulomatosis with polyangiitis; MPO, myeloperoxidase; P, perinuclear; PR3, proteinase 3; ANCA, antineutrophil cytoplasmic antibody; C, cytoplasmic.
